# Supplementary material for: Chitosan nanoparticles’ functionality as redox active drugs through cytotoxicity, radical scavenging and cellular behaviour
Source: Royal Society of Chemistry journal article supplement (doi:10.1039/c8ib00038g), 2018-01-01
Supplement: c8ib00038g1.pdf [file c8ib00038g1.pdf]

## Chitosan nanoparticles functionality as redox active drugs through cytotoxicity radical scavenging and cellular behavior.

Sreelatha Sarangapani<sup>1\*</sup>, Ajeetkumar Patil<sup>1</sup>, Ngeow Yoke keng<sup>2</sup>, Rosmin Elsa Mohan<sup>3</sup> Anand Asundi<sup>2</sup>, Matthew J Lang<sup>1\*</sup>

<sup>1</sup>Biosystems & Micromechanics (Biosym) IRG, Singapore MIT Alliance for Research & Technology (SMART), Singapore.

<sup>2</sup> Department of Atomic & Molecular Physics, Manipal Academy of Higher Education, Manipal, India. <sup>3</sup> Dept of Biological Science, National University of Singapore, Singapore. <sup>4</sup> School of Mechanical and Aerospace Engineering, Nanyang Technological University, Singapore. <sup>5</sup> Department of Chemical and Biomolecular Engineering and Department of Molecular Physiology and Biophysics, Vanderbilt University, Nashville, TN 37235 (USA).

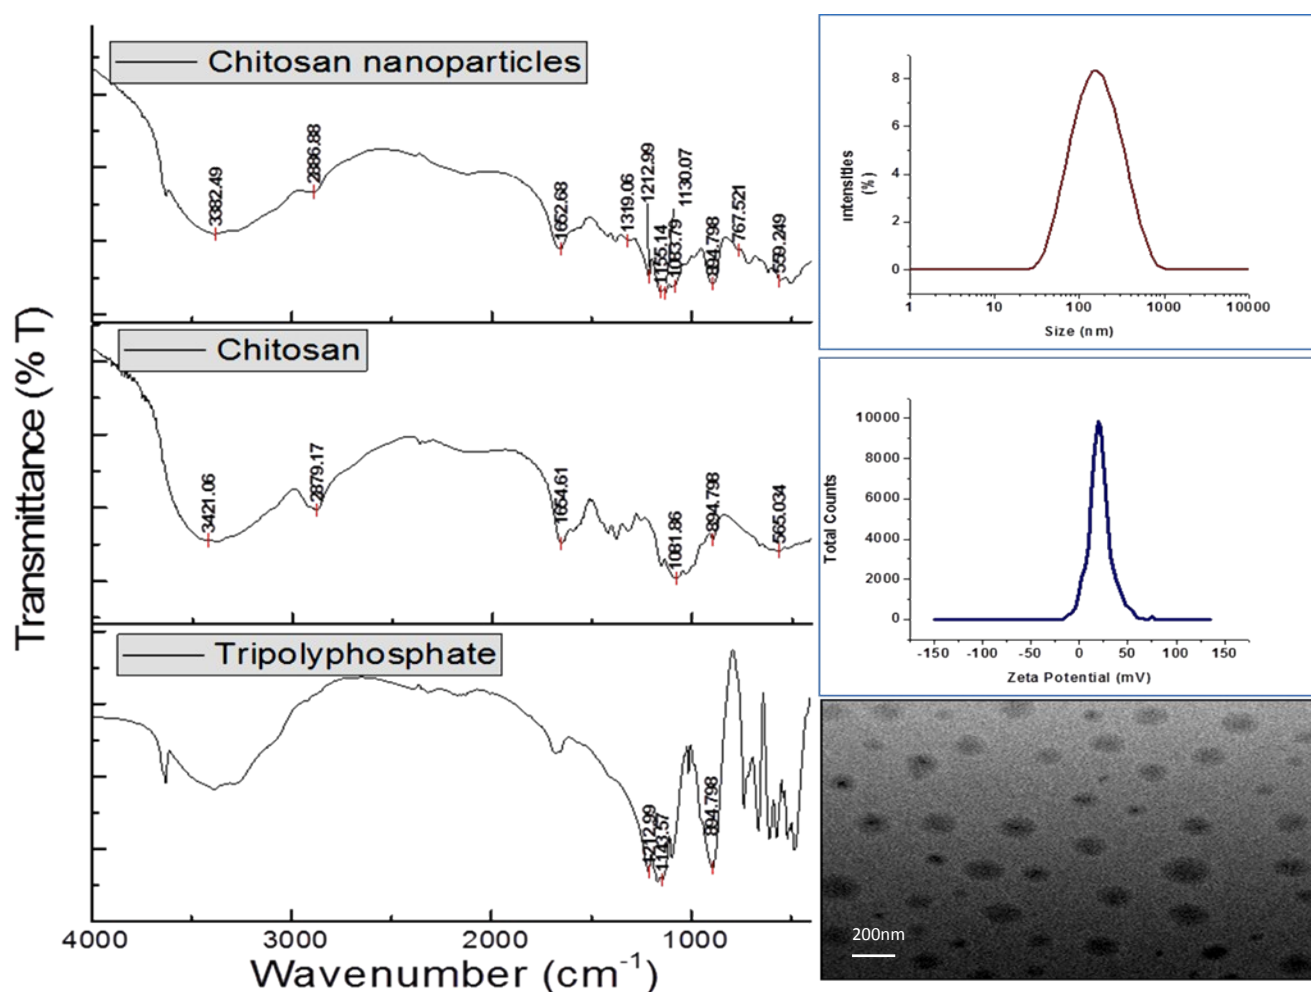

Figure S1- FTIR Spectra of chitosan nanoparticles, chitosan and TPP. b) Zeta-potential of chitosan nanoparticles c) Size distribution of chitosan nanoparticles with size centered at 133 nm d) TEM images of chitosan nanoparticles.

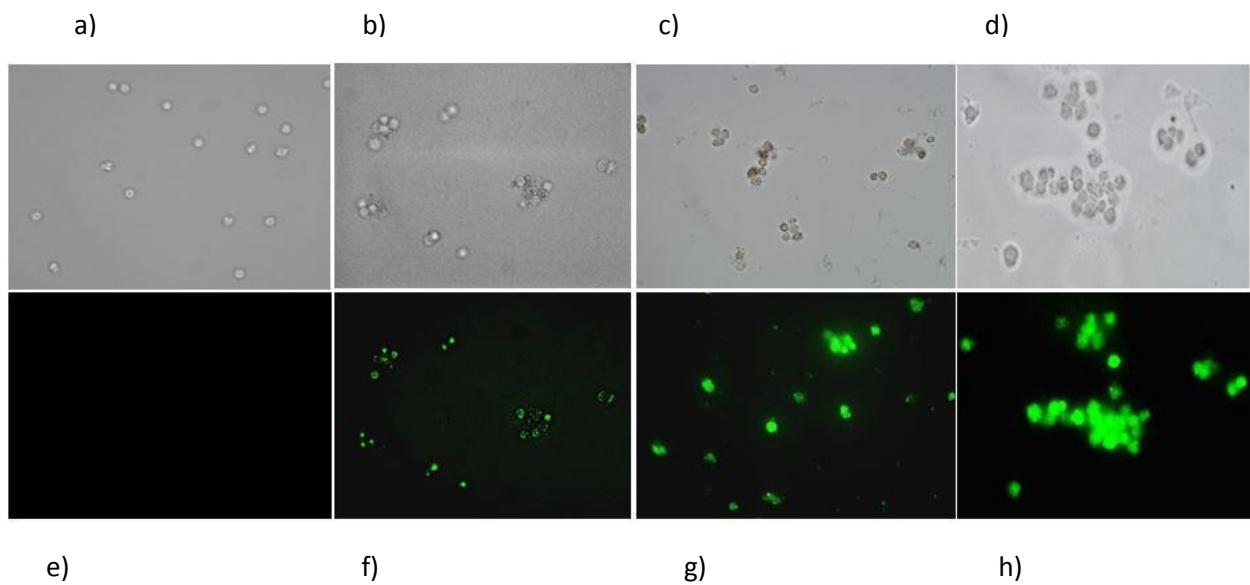

Figure S2. (a) – (d) Bright-field imaging of acute lymphoblastic leukemia cells at time point 0 minutes, 30 minutes, 4 hours and 24 hours respectively. (e) – (h) Fluorescence microscopy(20x magnification) images showing, that cellular uptake of FITC-labelled chitosan nanoparticles increased with time at 0 minutes, 30 minutes, 4 hours and 24 hours respectively.

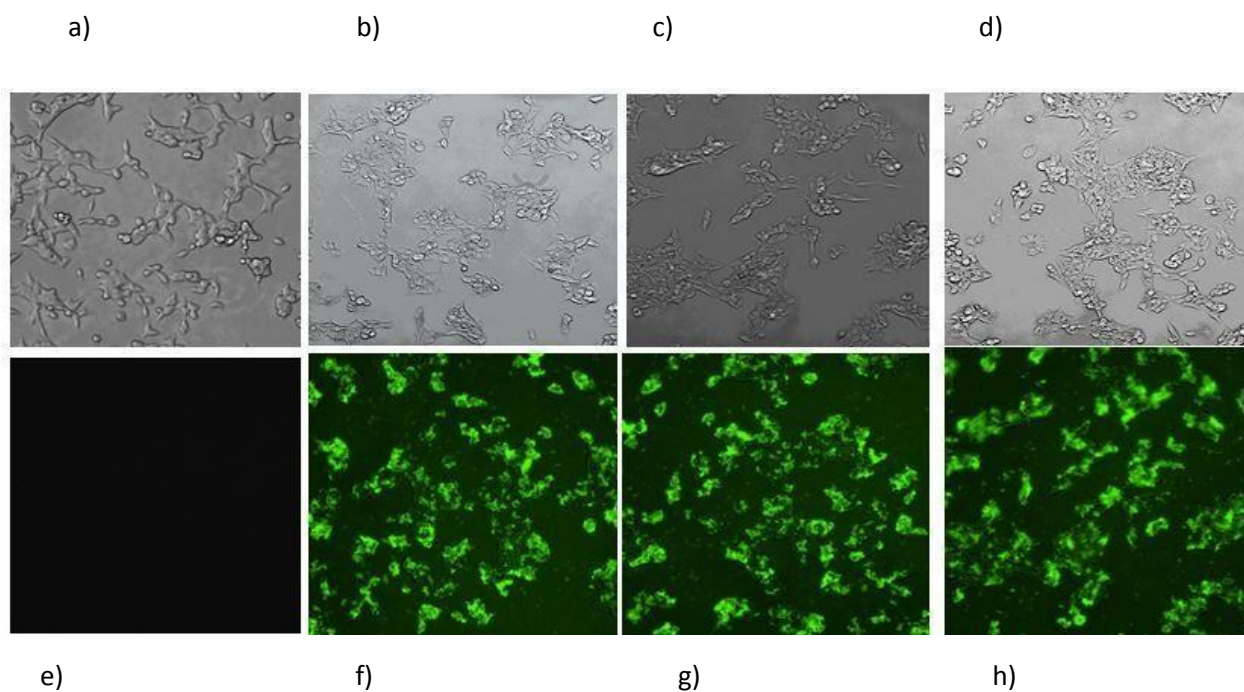

Figure S3. (a) – (d) Bright-field imaging of acute lymphoblastic leukemia cells at time point 0 minutes, 30 minutes, 4 hours and 24 hours respectively. (e) – (h) Fluorescence microscopy (20x magnification ) images showing, that cellular uptake of FITC-labelled chitosan nanoparticles with time at 0 minutes, 30 minutes, 4 hours and 24 hours respectively

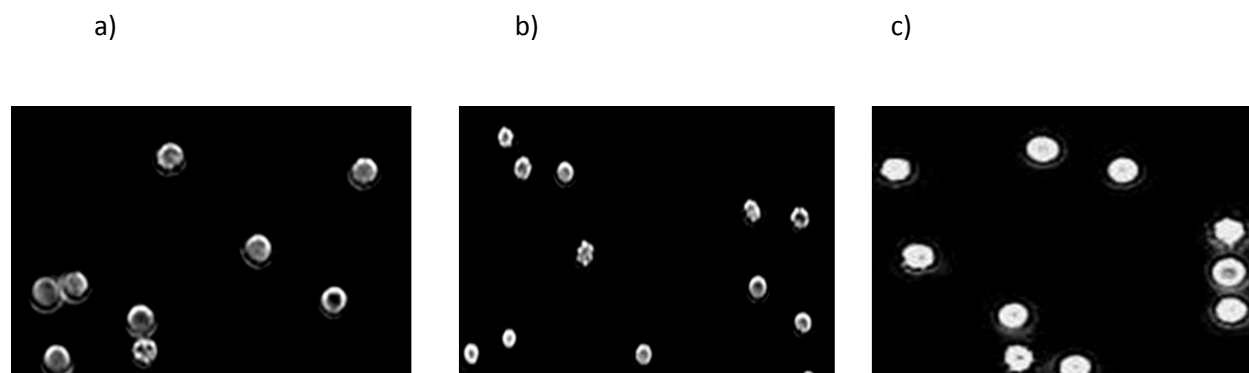

Figure -S4 . Morphology of RBCs (blood smear) (bright field images at 20X)a) Control b) with chitosan polymer c) with chitosan nanoparticles.

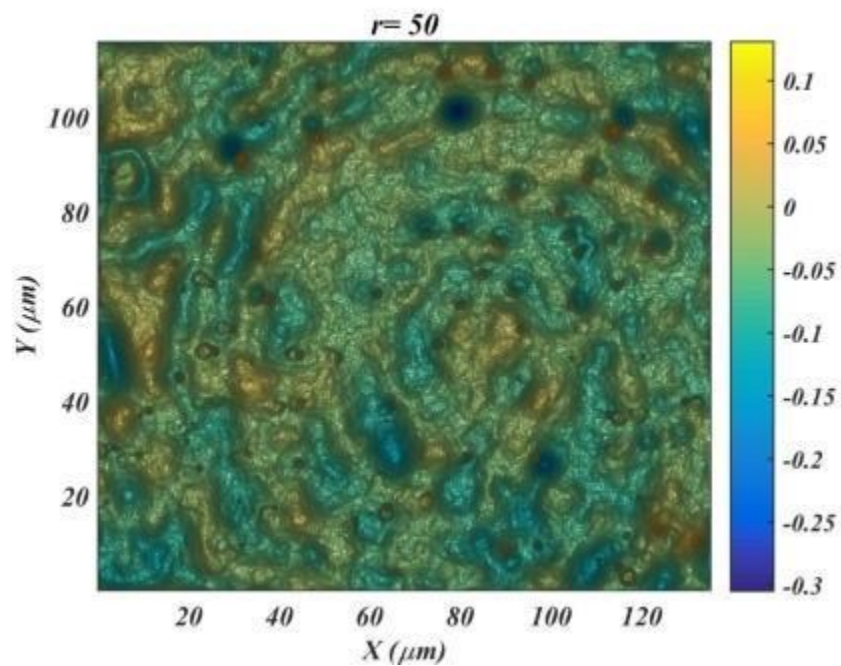

Figure -S5 .Phase imaging( 20x magnification). of chitosan nanoparticles only.
